# Supplementary material for: A new hybrid architecture consisting of highly mesoporous CNT/carbon nanofibers from starch
Source: Royal Society of Chemistry journal article supplement (doi:10.1039/c2jm32631k), 2012-01-01
Supplement: c2jm32631k.pdf [file c2jm32631k.pdf]

**Electronic Supporting Information for**

**New Hybrid Architecture Consisting of Highly  
Mesoporous CNT/Carbon Nanofibers from Starch**

Yun Kyoung Kim,<sup>a</sup> Seung Il Cha,<sup>b</sup> Soon Hyung Hong<sup>a</sup> and Yong Jin Jeong<sup>\*c</sup>

<sup>a</sup> Department of Materials Science and Engineering, Korea Advanced Institute of Science and Technology, Daejeon, 305-701, Republic of Korea

<sup>b</sup> Advanced Materials and Application Research Division, Korea Electrotechnology Research Institute, Changwon, 641-120, Republic of Korea

<sup>c</sup> Reactor Fuel Development Division, Korea Atomic Energy Research Institute, Daejeon, 305-353, Republic of Korea.

E-mail: yjjeong@kaeri.re.kr

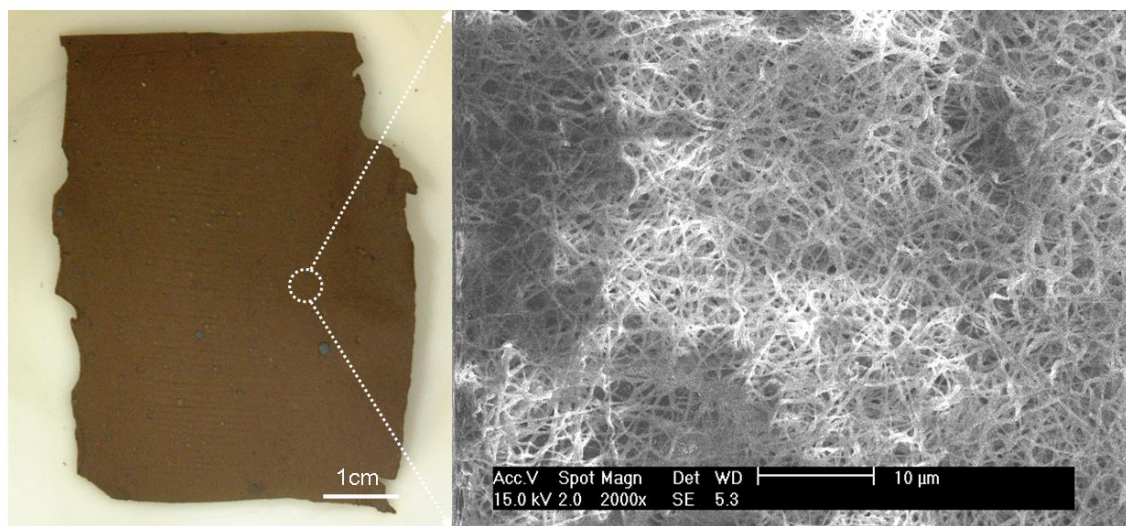

**Figure S1.** Optical image and SEM image of CNT/starch nanofiber web stabilized at 250°C for 1hr in air.

**Table S1.** Elemental analysis of the electrospun, air-stabilized, and carbonized nanofibers.

| I.D.              | Temp. [°C] | Carbon [%] | Nitrogen [%] | Hydrogen [%] | Sulfur [%] |
|-------------------|------------|------------|--------------|--------------|------------|
| Electrospinning   | 상온         | 51.61      | 0.213        | 8.3          | 1.533      |
| Air-stabilization | 250        | 62.54      | 0.328        | 2.04         | 0.785      |
|                   | 500        | 80.97      | 0.368        | 1.921        | 0.344      |
| Carbonization     | 700        | 92.81      | 0.335        | 0.738        | 0.252      |
|                   | 1,000      | 92.41      | 0.417        | 0.989        | 0.000      |
|                   | 1,400      | 95.09      | 0.699        | 0.115        | 0.048      |

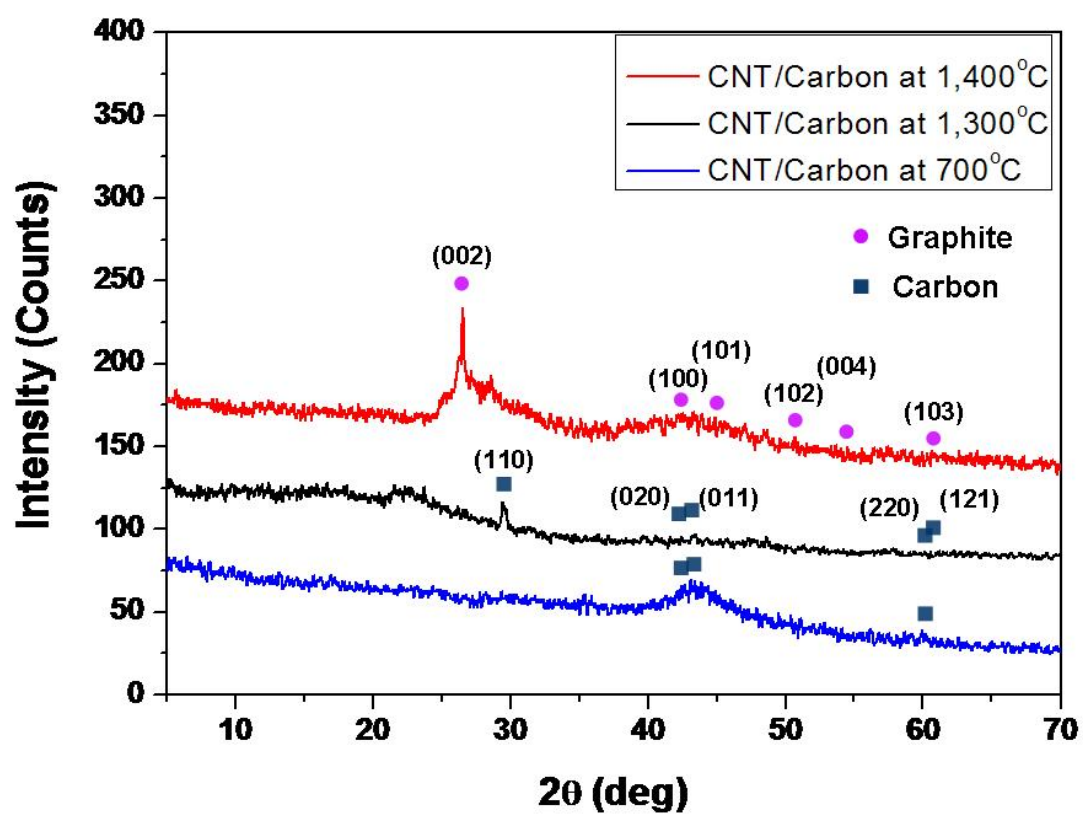

**Figure S3.** XRD analysis exhibiting that graphitization of CNT/carbon nanofibers occurs above 1400 °C.

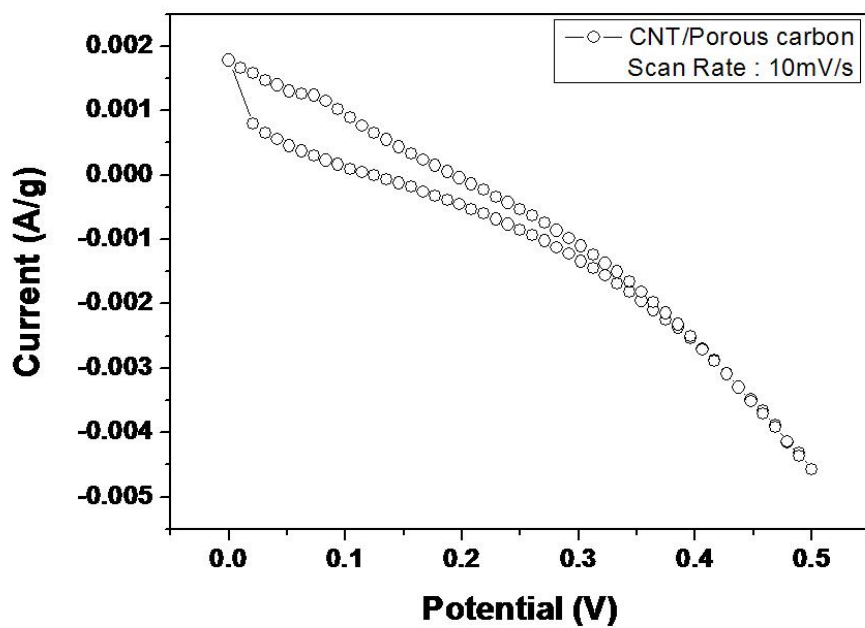

**Figure S3.** CV curve of porous CNT/carbon nanofibers heat-treated at 1400 °C.

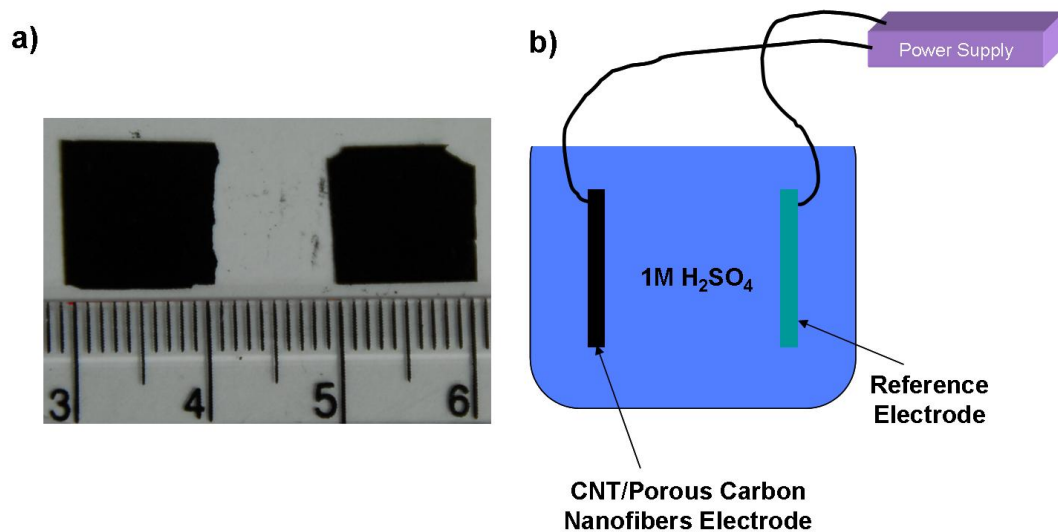

**Figure S4.** a) Optical image of CNT/carbon nanofibers electrode cut by  $1 \times 1$  cm, b) A schematic of a cell test method.

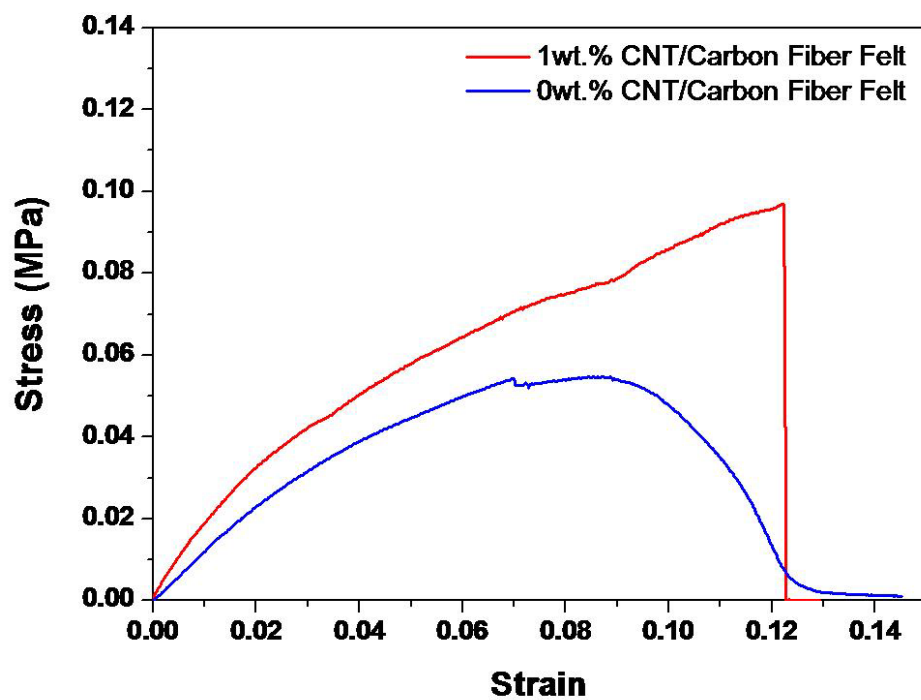

**Figure S5.** The microtensile test of starch nanofibers carbonized at 1400 °C and 1wt.% CNT/starch nanofibers carbonized at 1400 °C electrodes.
